# Supplementary material for: Dual gene expression cassette is superior than single gene cassette for enhancing sheath blight tolerance in transgenic rice
Source: PubMed Central journal article supplement (PMC5554252; doi:10.1038/s41598-017-08180-x), 2017-08-11
Supplement: 41598_2017_8180_MOESM1_ESM.pdf [file 41598_2017_8180_MOESM1_ESM.pdf]

**Dual gene expression cassette is superior than single gene cassette for enhancing sheath blight tolerance in transgenic rice**

Subhasis Karmakar<sup>1</sup>, Kutubuddin A. Molla<sup>1,2</sup>, Kaushik Das<sup>1</sup>, Sailendra Nath Sarkar<sup>1</sup>, Swapan

K. Datta<sup>1,4</sup> & Karabi Datta<sup>1,\*</sup>

\*(Corresponding author)

**Supplementary Table.1** List of primers used in PCR screening of transgenic plants

| Gene          | Primer sequence (from 5'- 3')                        | Amplicon size | Annealing temperature |
|---------------|------------------------------------------------------|---------------|-----------------------|
| <i>OsCHI1</i> | F-TCGCCTCCATCATATCGCCCTC<br>R-CGTCATCCAGAACCAGAACGCC | 490bp         | 53°C                  |
| <i>AtNPR1</i> | F-ATGGACACCACCATTGATGG<br>R-TCACCGACGACGATGAGAGAG    | 1.7 kbp       | 58.1°C                |
| <i>HPT</i>    | F-CGCCGATGGTTTCTACAAAGA<br>R-TCAATGACCGCTGTTATGCG    | 495 bp        | 58.6°C                |
| <i>NOS</i>    | F-GGTACCGATCGTTCAAACATTTGGC<br>R-GAATTCCCGATCTAGTAAC | 260 bp        | 50°C                  |

**Supplementary Table. 2** Primers for quantitative real-time polymerase chain reaction (qRT-PCR).

| Gene             | Primer sequence (5'-3')                             | Accession number | Amplicon size (bp) | T <sub>m</sub> of amplicon |
|------------------|-----------------------------------------------------|------------------|--------------------|----------------------------|
| <i>OsCHI11</i>   | F-GTTCTGGTTCTGGATGACGC<br>R- GCCGTTGATGATGTTGGTGA   | X54367           | 139                | 87.50                      |
| <i>AtNPR1</i>    | F- CATTCTCTCAAAGGCCGACT<br>R-AAGACGTTGAGCAAGTGCAA   | NM_105102        | 159                | 80.00                      |
| <i>OsPAL/ZB8</i> | F-GTGTCTGCGAGGTGATGAA<br>R-TTCCCTCCAAGATGTGCTTC     | X87946.1         | 118                | 81.00                      |
| <i>OsNHI</i>     | F-TGAAAGAAGGGACCCACAAC<br>R- AGGTGGATTTGCACCAGAAC   | GU722160         | 202                | 78.50                      |
| <i>RC24</i>      | F-TCTGCTGCAGCCAGTAC<br>R-GGAGAAGCATCTGGTCGAAG       | X87109.1         | 174                | 79.00                      |
| <i>OsPR5</i>     | F-GCCACTTCTTCCGCTATCCT<br>R -CACGTTGATGGTCCACGTAT   | X68179           | 174                | 81.50                      |
| <i>OsAOS2</i>    | F-AAGAAGGGGGAGATGCTGTT<br>R-TGCTTGTTGTCAACGCTAGG    | AY055775.1       | 182                | 79.50                      |
| <i>OsMAPK6</i>   | F-TATGTGCACTCGGCAAATGT<br>R-TCGATACCAACGAGTGACCA    | AB183398         | 156                | 82.00                      |
| <i>OsPR10a</i>   | F- AGCTGGCCATTGCTTTGG<br>R-GCTTCGTCTCCGTCGAGTGT     | AF274850         | 65                 | 79.00                      |
| <i>OsPR1b</i>    | F-AGCTGGCCATTGCTTTGG<br>R-CGTTGTGGAGCCTCACGTAGT     | EF061247         | 90                 | 80.50                      |
| <i>β-tubulin</i> | F-GGAGTCACATGCTGCCTAAGGTT<br>R-TCACTGCCAGCTTACGGAGG | X78143           | 64                 | 77.50                      |

**Supplementary Table.3** Relative fold change of endogenous *PR* marker, defense related, JA and SA pathway genes in qRT-PCR after 24 and 48hr post infection

| Relative fold change |              |      |                |      |              |      |                |      |               |      |               |      |              |      |             |      |
|----------------------|--------------|------|----------------|------|--------------|------|----------------|------|---------------|------|---------------|------|--------------|------|-------------|------|
|                      | <i>OsPR5</i> |      | <i>OsMAPK6</i> |      | <i>OsNHI</i> |      | <i>OsPR10a</i> |      | <i>OsPR1b</i> |      | <i>OsAOS2</i> |      | <i>OsPAL</i> |      | <i>RC24</i> |      |
|                      | 24h          | 48h  | 24h            | 48h  | 24h          | 48h  | 24h            | 48h  | 24h           | 48h  | 24h           | 48h  | 24h          | 48 h | 24h         | 48h  |
| Transgenic lines     |              |      |                |      |              |      |                |      |               |      |               |      |              |      |             |      |
| CN5-2-1              | 1.15         | 0.90 | 0.92           | 1.05 | 8.46         | 3.87 | 3.34           | 2.78 | 1.21          | 2.17 | 1.57          | 3.23 | 1.14         | 1.36 | 0.73        | 3.63 |
| C8-9-1               | 0.54         | 0.64 | 0.44           | 0.65 | 3.46         | 2.04 | 2.52           | 2.06 | 0.65          | 1.04 | 1.71          | 2.37 | 0.60         | 0.77 | 0.28        | 2.41 |
| N4-3-2               | 0.78         | 0.64 | 0.51           | 1.01 | 4.96         | 2.48 | 2.18           | 2.34 | 0.92          | 1.87 | 1.57          | 3.25 | 1.49         | 1.85 | 0.37        | 1.63 |
